# Supplementary material for: Construction of a prognostic risk assessment model for lung adenocarcinoma based on Integrin β family‐related genes
Source: PubMed Central journal article supplement (PMC9169214; doi:10.1002/jcla.24419), 2022-04-11
Supplement: JCLA-36-e24419-s001.pdf [file JCLA-36-e24419-s001.pdf]

| gene     | HR       | z        | pvalue   |
|----------|----------|----------|----------|
| RHOV     | 1.205484 | 4.942623 | 7.71E-07 |
| GGTLC1   | 0.899824 | -4.92725 | 8.34E-07 |
| PLCD3    | 1.34788  | 4.811335 | 1.50E-06 |
| MYOZ1    | 0.822067 | -4.72713 | 2.28E-06 |
| PKP2     | 1.206925 | 4.684996 | 2.80E-06 |
| DKK1     | 1.11774  | 4.618511 | 3.87E-06 |
| NTSR1    | 1.110289 | 4.578397 | 4.69E-06 |
| LYPD3    | 1.178344 | 4.55477  | 5.24E-06 |
| FAM83A   | 1.20508  | 4.447914 | 8.67E-06 |
| ABCC12   | 0.931977 | -4.40046 | 1.08E-05 |
| CREG2    | 1.154105 | 4.390937 | 1.13E-05 |
| VAX1     | 1.065737 | 4.325541 | 1.52E-05 |
| ABCC2    | 1.103584 | 4.090694 | 4.30E-05 |
| KRT6C    | 1.064979 | 4.074084 | 4.62E-05 |
| TNS4     | 1.127659 | 4.043955 | 5.26E-05 |
| KRT6A    | 1.078511 | 3.980635 | 6.87E-05 |
| KYNU     | 1.171153 | 3.979628 | 6.90E-05 |
| CTSV     | 1.170745 | 3.961152 | 7.46E-05 |
| FCER2    | 0.893195 | -3.953   | 7.72E-05 |
| MS4A1    | 0.887484 | -3.91678 | 8.97E-05 |
| PLA2G1B  | 0.914278 | -3.88556 | 0.000102 |
| FETUB    | 1.069751 | 3.851885 | 0.000117 |
| KRT81    | 1.098834 | 3.836151 | 0.000125 |
| IL1R2    | 1.171662 | 3.800241 | 0.000145 |
| TMPRSS11 | 1.065895 | 3.739056 | 0.000185 |
| AKAP12   | 1.179634 | 3.736571 | 0.000187 |
| MYBPHL   | 0.924786 | -3.71272 | 0.000205 |
| DNER     | 1.118566 | 3.654266 | 0.000258 |
| KCNK17   | 0.866816 | -3.65221 | 0.00026  |
| GJB3     | 1.117914 | 3.642514 | 0.00027  |
| CYP17A1  | 0.903895 | -3.63284 | 0.00028  |
| GFI1B    | 0.918293 | -3.62996 | 0.000283 |
| 4-Mar    | 1.13977  | 3.611147 | 0.000305 |
| AHNAK2   | 1.166732 | 3.580992 | 0.000342 |
| TRIM7    | 1.168357 | 3.554636 | 0.000379 |
| ACSM5    | 0.900155 | -3.51789 | 0.000435 |
| IGF2BP1  | 1.061563 | 3.507349 | 0.000453 |
| GRAMD1E  | 1.164665 | 3.484385 | 0.000493 |
| CD1C     | 0.876786 | -3.45333 | 0.000554 |
| SPOCK1   | 1.124376 | 3.453018 | 0.000554 |
| SH2D5    | 1.112171 | 3.438359 | 0.000585 |
| STC1     | 1.18004  | 3.436596 | 0.000589 |
| SFTPC    | 0.947918 | -3.40892 | 0.000652 |
| HPGDS    | 0.861012 | -3.39963 | 0.000675 |
| SCGB3A1  | 0.931292 | -3.39868 | 0.000677 |
| CEACAM8  | 0.942073 | -3.39607 | 0.000684 |
| C1QL2    | 0.950055 | -3.36721 | 0.000759 |
| FCAMR    | 0.932598 | -3.34097 | 0.000835 |
| SPRR1B   | 1.048556 | 3.325931 | 0.000881 |
| STAR     | 0.889991 | -3.29716 | 0.000977 |
